# Supplementary material for: Dimethyl carbonate synthesis from carbon dioxide using ceria–zirconia catalysts prepared using a templating method: characterization, parametric optimization and chemical equilibrium modeling
Source: Royal Society of Chemistry journal article supplement (doi:10.1039/c6ra22643d), 2016-01-01
Supplement: c6ra22643d1.pdf [file c6ra22643d1.pdf]

**Dimethyl carbonate synthesis from carbon-di-oxide by ceria-zirconia catalysts prepared using templating method: Characterization, parametric optimization and chemical equilibrium modeling**

Praveen Kumar<sup>a,b</sup>, Patrick With<sup>b,c</sup>, Vimal Chandra Srivastava<sup>a,\*</sup>, Kartikeya Shukla<sup>a</sup>, Roger Gläser<sup>b</sup>, Indra Mani Mishra<sup>a,d</sup>

<sup>a</sup>Department of Chemical Engineering, Indian Institute of Technology Roorkee, Roorkee 247667, Uttarakhand, India

<sup>b</sup>Institute of Chemical Technology, Universität Leipzig, Linnéstraße 3, 04103 Leipzig, Germany

<sup>c</sup>Chemical Division, Leibniz Institute for Surface Modification, Permoserstr. 15, 04318 Leipzig, Germany

<sup>d</sup>Department of Chemical Engineering, Indian Institute of Technology (ISM), Dhanbad, 826004, India

**\*Corresponding Author:** Phone: +91–1332–285889; fax: +91–1332–276535;

E-mails: vimalcsr@yahoo.co.in, vimalfch@iitr.ac.in (V.C. Srivastava); praveen.singh@daad-alumni.de, praveen.zon@gmail.com (P. Kumar); patrick.with@iom-leipzig.de (P. With); kartikeyashr@gmail.com (KS); roger.glaeser@uni-leipzig.de (Roger Gläser); immishra49@gmail.com, mishra.im.che@ismdhanbad.ac.in (I.M. Mishra)

**Supporting Information**

**Table S1. Physical properties and the pure components parameters [Piñeroa et al., 2007].**

|                      | Methanol | CO <sub>2</sub> | DMC     | H <sub>2</sub> O |
|----------------------|----------|-----------------|---------|------------------|
| MW (g/mol)           | 32.042   | 44.01           | 90.60   | 18.02            |
| T <sub>c</sub> (K)   | 512.6    | 304.2           | 548.0   | 647.3            |
| P <sub>c</sub> (MPa) | 8.096    | 7.382           | 4.500   | 22.09            |
| <i>K</i>             | -0.16816 | 0.04285         | 0.38462 | -0.06635         |
| <i>Ω</i>             | 0.565    | 0.225           | 0.385   | 0.344            |

**Table S2. Temperature dependence of binary interaction parameters  $k_{ij}$  and  $l_{ij}$  [Bustamante et al., 2012].**

| System                             | $k_{ij}$                         | $l_{ij}$                                                 |
|------------------------------------|----------------------------------|----------------------------------------------------------|
| CO <sub>2</sub> (1) + methanol (2) | $k_{12} = -0.04889 + 0.000142 T$ | $l_{12} = 0.11655 - 0.00049 T$                           |
|                                    | $k_{21} = -0.32186 + 0.001202 T$ | $l_{21} = 0.0034067 - 3 \times 10^{-5} T$                |
| CO <sub>2</sub> (1) + water (2)    | $k_{12} = 3.06296 - 0.009680 T$  | $l_{12} = 0$                                             |
|                                    | $k_{21} = -0.35981 + 0.000859 T$ | $l_{21} = 0$                                             |
| CO <sub>2</sub> (1) + DMC (2)      | $k_{12} = -0.00432 + 0.000010 T$ | $l_{12} = 8.2567 \times 10^{-5} + 1.47 \times 10^{-6} T$ |
|                                    | $k_{21} = -0.03110 + 0.000080 T$ | $l_{21} = 0.0002787 - 2.67 \times 10^{-6} T$             |
| methanol (1) + water (2)           | $k_{12} = -0.61880 + 0.001570 T$ | $l_{12} = 0$                                             |
|                                    | $k_{21} = -0.39211 + 0.000815 T$ | $l_{21} = 0$                                             |
| DMC (1) + methanol (2)             | $k_{12} = -0.03545 + 0.000282 T$ | $l_{12} = 0$                                             |
|                                    | $k_{21} = 0.03595 - 0.000035 T$  | $l_{21} = 0$                                             |
| DMC (1) + water (2)                | $k_{12} = -0.34043$              | $l_{12} = -9.22 \times 10^{-5}$                          |
|                                    | $k_{21} = -0.0796$               | $l_{21} = 1.942 \times 10^{-4}$                          |

**Table S3. Values of  $K_{eq}$  for DMC synthesis by direct  $CO_2$  conversion using  $Ce_{0.5}Zr_{0.5}O_2$  at different temperatures and constant pressure,  $P=150$  bar.**

| <b>T<br/>(K)</b> | <b><math>y_{o,MeOH}</math></b> | <b><math>y_{o,CO_2}</math></b> | <b><math>X_{eq,MeOH}</math>,<br/>experimental</b> | <b><math>y_{eq,MeOH}</math></b> | <b><math>y_{eq,CO_2}</math></b> | <b><math>y_{eq,DMC}</math></b> | <b><math>y_{eq,H_2O}</math></b> | <b><math>K_{eq}</math> (l/mol)</b> |
|------------------|--------------------------------|--------------------------------|---------------------------------------------------|---------------------------------|---------------------------------|--------------------------------|---------------------------------|------------------------------------|
| 373              | 0.697797                       | 0.302203                       | 0.004043                                          | 0.696515                        | 0.302261                        | 0.000612258                    | 0.0006123                       | $6.811 \times 10^{-8}$             |
| 393              | 0.708692                       | 0.291308                       | 0.008680                                          | 0.705990                        | 0.291469                        | 0.001270488                    | 0.0012705                       | $3.629 \times 10^{-7}$             |
| 413              | 0.718828                       | 0.281172                       | 0.0055832                                         | 0.717130                        | 0.281295                        | 0.000787461                    | 0.0007875                       | $1.713 \times 10^{-7}$             |
| 433              | 0.728283                       | 0.271717                       | 0.0016944                                         | 0.727780                        | 0.271759                        | 0.000230430                    | 0.0002304                       | $1.823 \times 10^{-8}$             |
| 453              | 0.737123                       | 0.262877                       | 0.0004182                                         | 0.737002                        | 0.262888                        | 0.000054981                    | 0.0000550                       | $1.327 \times 10^{-9}$             |
